# Supplementary material for: Aluminium complexes containing indolyl-phenolate ligands as catalysts for ring-opening polymerization of cyclic esters
Source: Royal Society of Chemistry journal article supplement (doi:10.1039/d2ra05112e), 2022-01-01
Supplement: d2ra05112e1.pdf [file d2ra05112e1.pdf]

Electronic Supplementary Material (ESI) for Dalton Transactions.  
This journal is © The Royal Society of Chemistry 2020

## Electronic Supplementary Information (ESI) for

# Aluminium complexes containing indolyl-phenolate ligands as catalysts for ring-opening polymerization of cyclic esters

Chi-Tien Chen\* and Zi-Ling Lai

*Department of Chemistry, National Chung Hsing University, Taichung 402, Taiwan*

*E-mail: ctchen@dragon.nchu.edu.tw*

## Contents

|                                                                                                                       |    |
|-----------------------------------------------------------------------------------------------------------------------|----|
| The linear relationship between the number-average molecular weight ( $M_n$ ) and the monomer-to-initiator ratio..... | S2 |
| $^1\text{H}$ NMR spectrum of PCL-100 catalyzed by <b>1</b> in the presence of BnOH in toluene at 80 °C.....           | S2 |
| $^1\text{H}$ NMR spectrum of PLA-100 catalyzed by <b>1</b> in the presence of BnOH in toluene at 100 °C .....         | S3 |
| Crystal structures data.....                                                                                          | S4 |
| Spectra data of ligand precursors and complexes.....                                                                  | S5 |

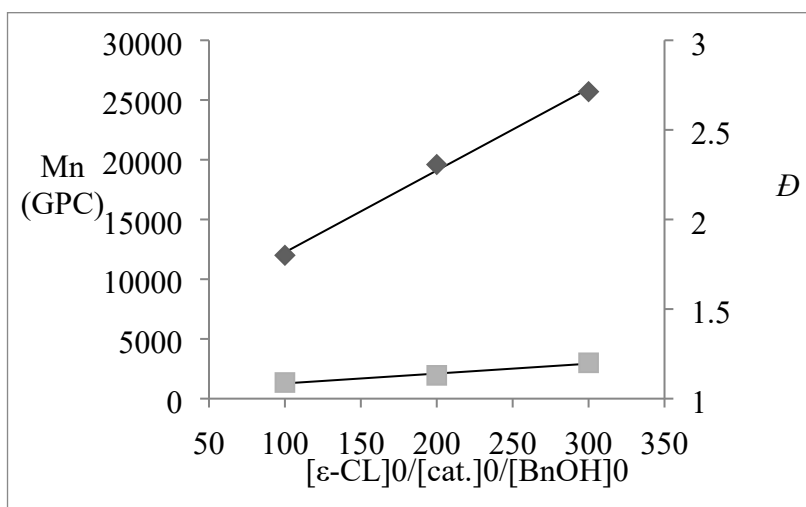

**Figure S1** Polymerization of  $\epsilon$ -caprolactone catalyzed by **1** in the presence of BnOH in toluene at 80 °C

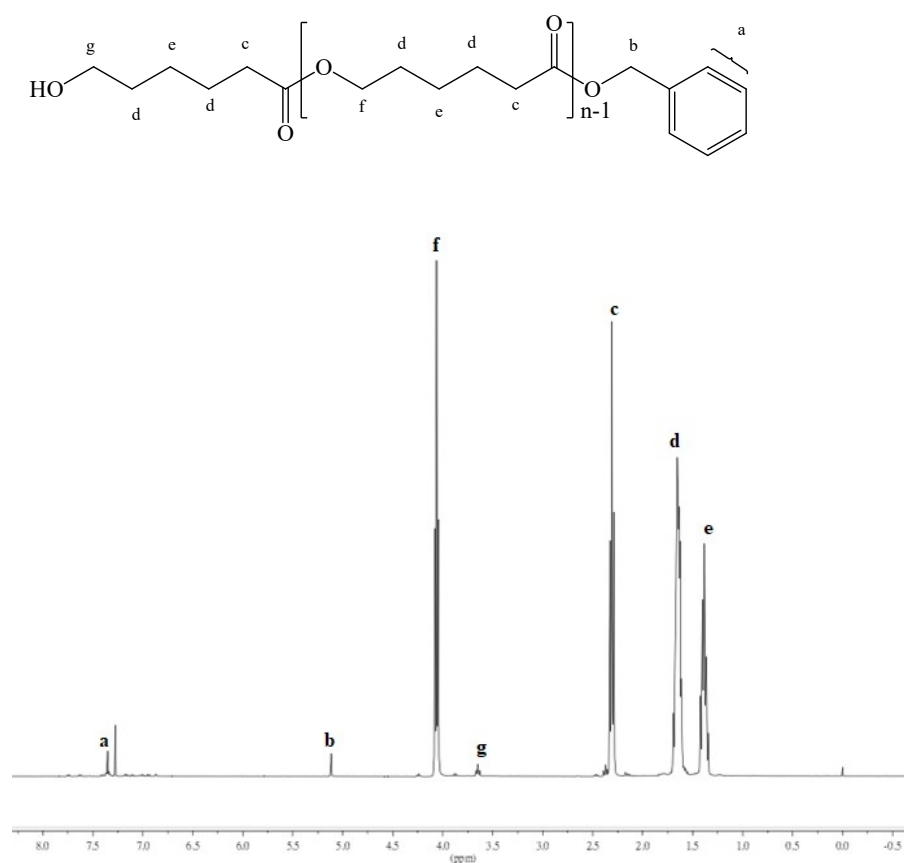

**Figure S2** <sup>1</sup>H NMR spectrum of PCL-100 catalyzed by **1** in the presence of BnOH in toluene at 80 °C

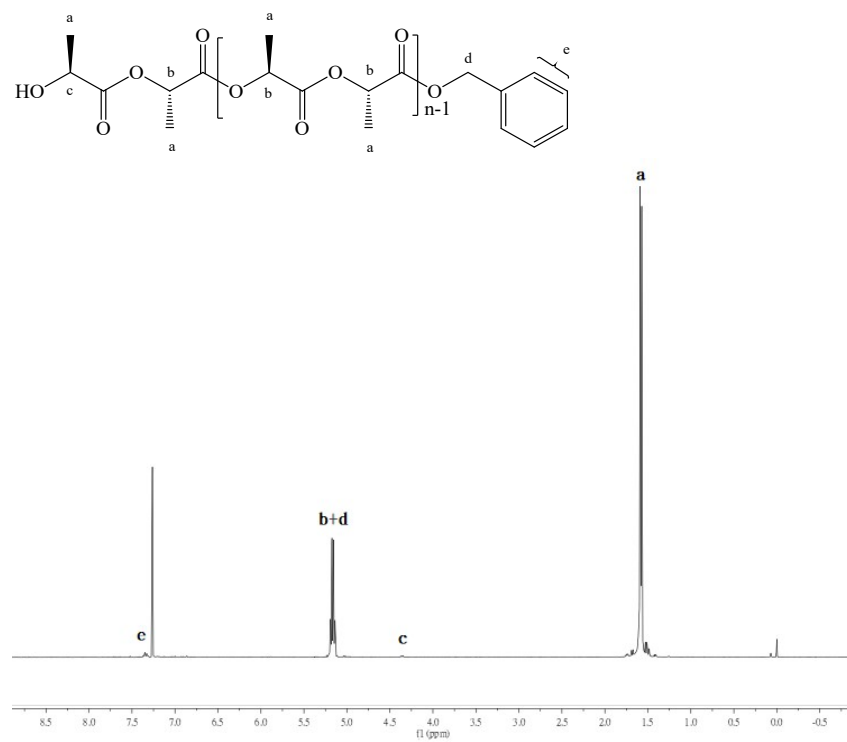

**Figure S3** <sup>1</sup>H NMR spectrum of PLA-100 catalyzed by **1** in the presence of BnOH in toluene at 100 °C

**Table S1** Summary of crystal data for compound **5**

**5**

|                                       |                                                                   |
|---------------------------------------|-------------------------------------------------------------------|
| Formula                               | C <sub>28</sub> H <sub>20</sub> AlClN <sub>2</sub> O <sub>2</sub> |
| Fw                                    | 478.89                                                            |
| T, K                                  | 150(2)                                                            |
| Crystal system                        | Monoclinic                                                        |
| Space group                           | C <sub>2</sub> /c                                                 |
| <i>a</i> , Å                          | 15.5736(7)                                                        |
| <i>b</i> , Å                          | 10.6795(7)                                                        |
| <i>c</i> , Å                          | 14.9564(9)                                                        |
| α°                                    | 90                                                                |
| β°                                    | 113.626(3)                                                        |
| γ°                                    | 90                                                                |
| <i>V</i> , Å <sup>3</sup>             | 2279.0(2)                                                         |
| <b>Z</b>                              | 4                                                                 |
| ρ <sub>calc</sub> , Mg/m <sup>3</sup> | 1.396                                                             |
| μ(Mo Kα), mm <sup>-1</sup>            | 0.236                                                             |
| Reflections<br>collected              | 22697                                                             |
| No. of parameters                     | 155                                                               |
| <i>R</i> 1 <sup>a</sup>               | 0.0324                                                            |
| w <i>R</i> 2 <sup>a</sup>             | 0.0845                                                            |
| GoF <sup>b</sup>                      | 1.038                                                             |

<sup>a</sup>  $R1 = [\sum (|F_o| - |F_c|) / \sum |F_o|]$ ;  $wR2 = [\sum w(F_o^2 - F_c^2)^2 / \sum w(F_o^2)^2]^{1/2}$ ,  $w = 0.10$ .

<sup>b</sup>  $GoF = [\sum w(F_o^2 - F_c^2)^2 / (N_{\text{reflns}} - N_{\text{params}})]^{1/2}$ .

## Spectra data of ligand precursors and complexes

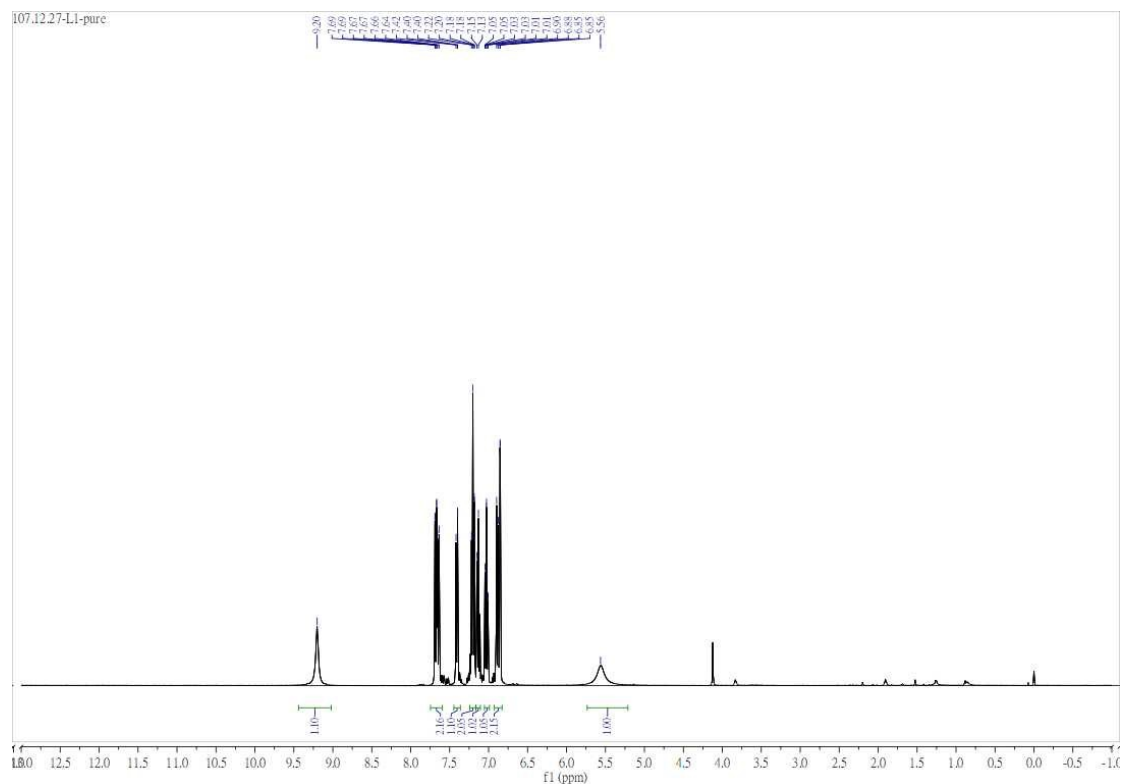

Figure S4.  $^1\text{H}$  NMR of IndPh<sup>H</sup>OH (L<sup>1</sup>H)

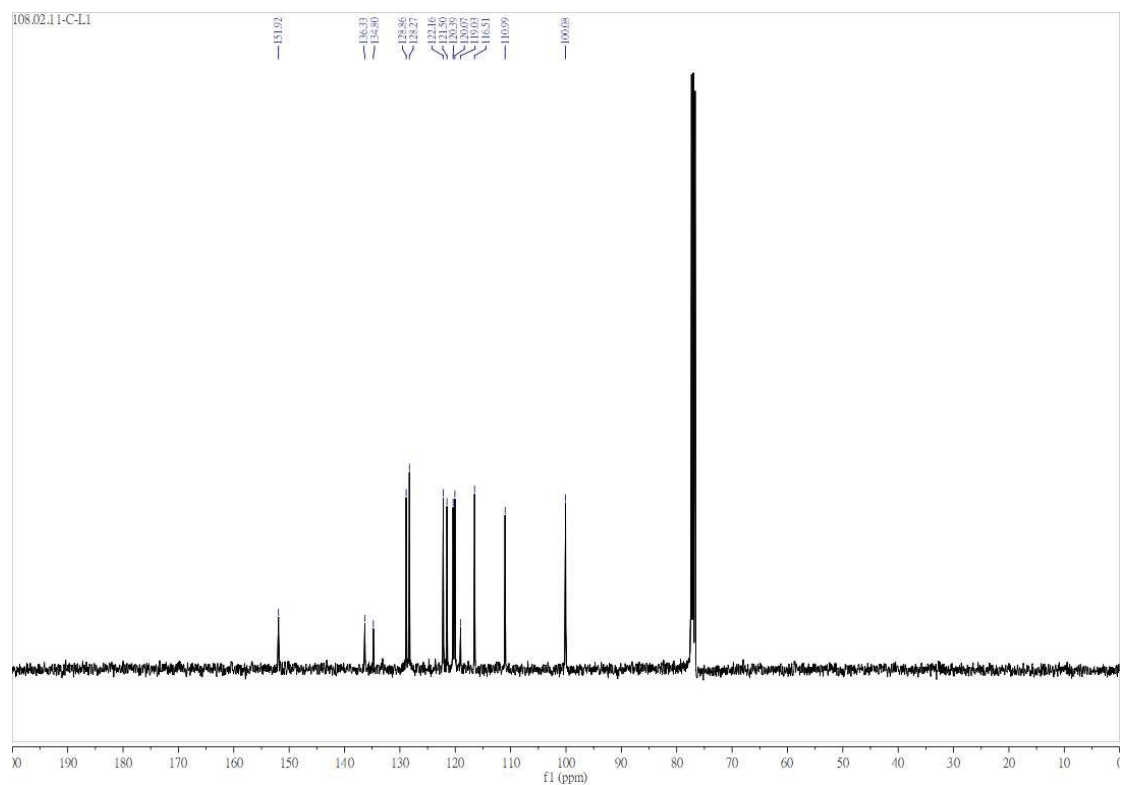

Figure S5.  $^{13}\text{C}$  NMR of IndPh<sup>H</sup>OH (L<sup>1</sup>H)

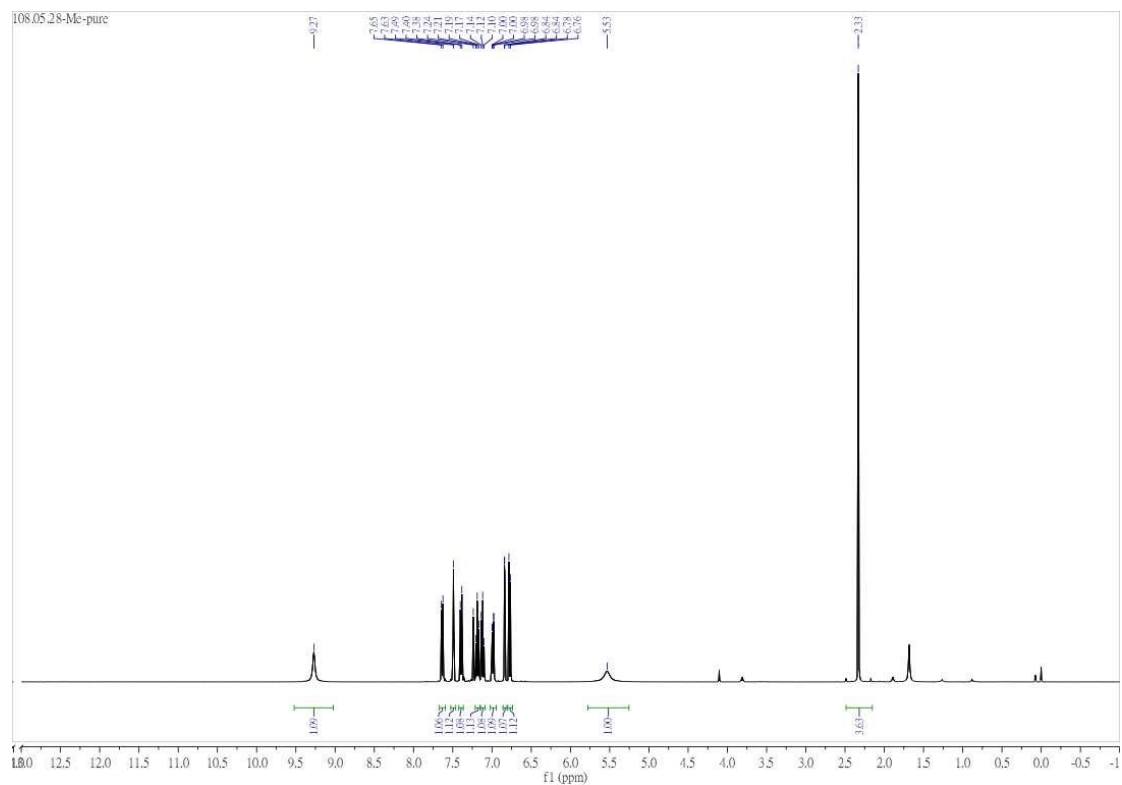

Figure S6.  $^1\text{H}$  NMR of IndPh<sup>Me</sup>OH ( $\text{L}^2\text{H}$ )

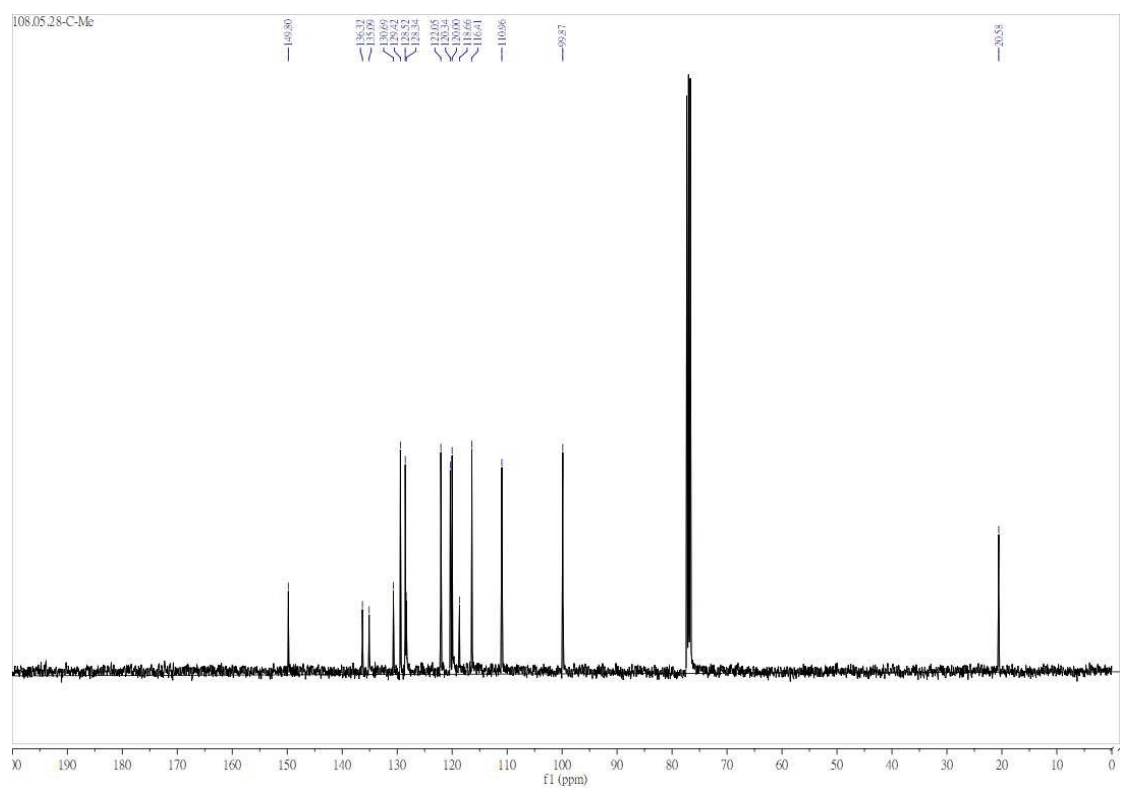

Figure S7.  $^{13}\text{C}$  NMR of IndPh<sup>Me</sup>OH ( $\text{L}^2\text{H}$ )

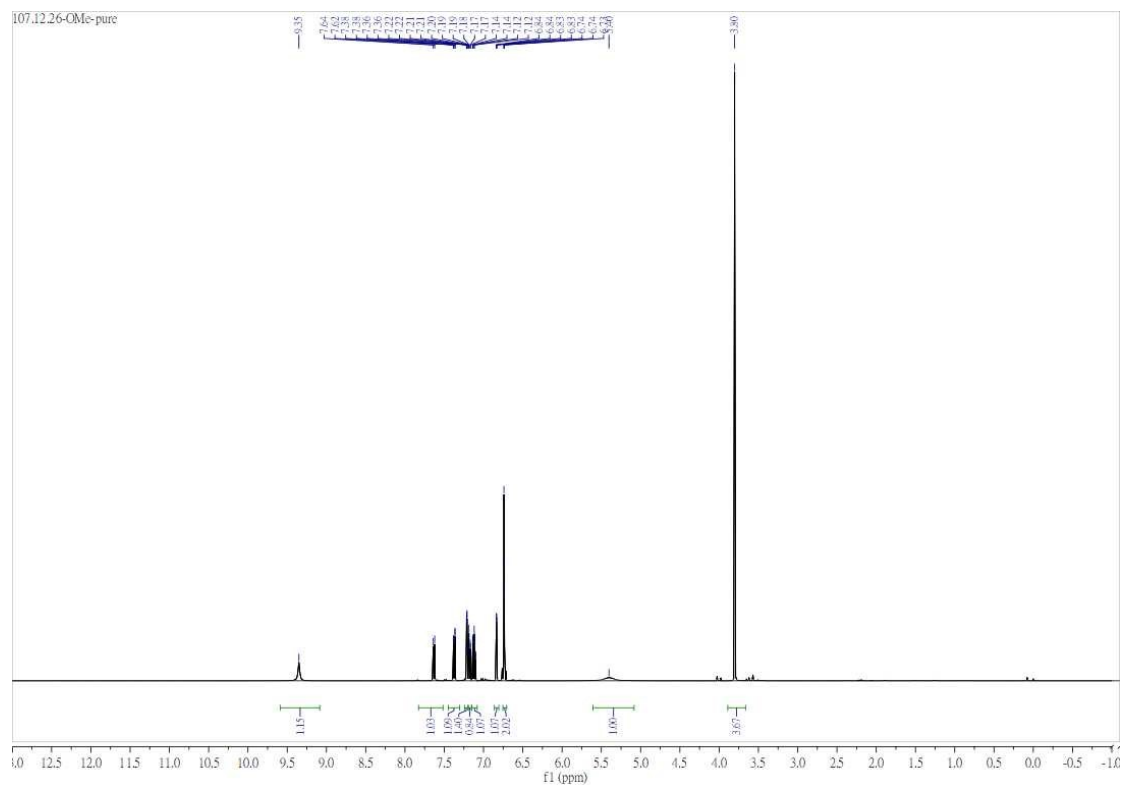

Figure S8.  $^1\text{H}$  NMR of  $\text{IndPh}^{\text{OMe}}\text{OH}$  ( $\text{L}^3\text{H}$ )

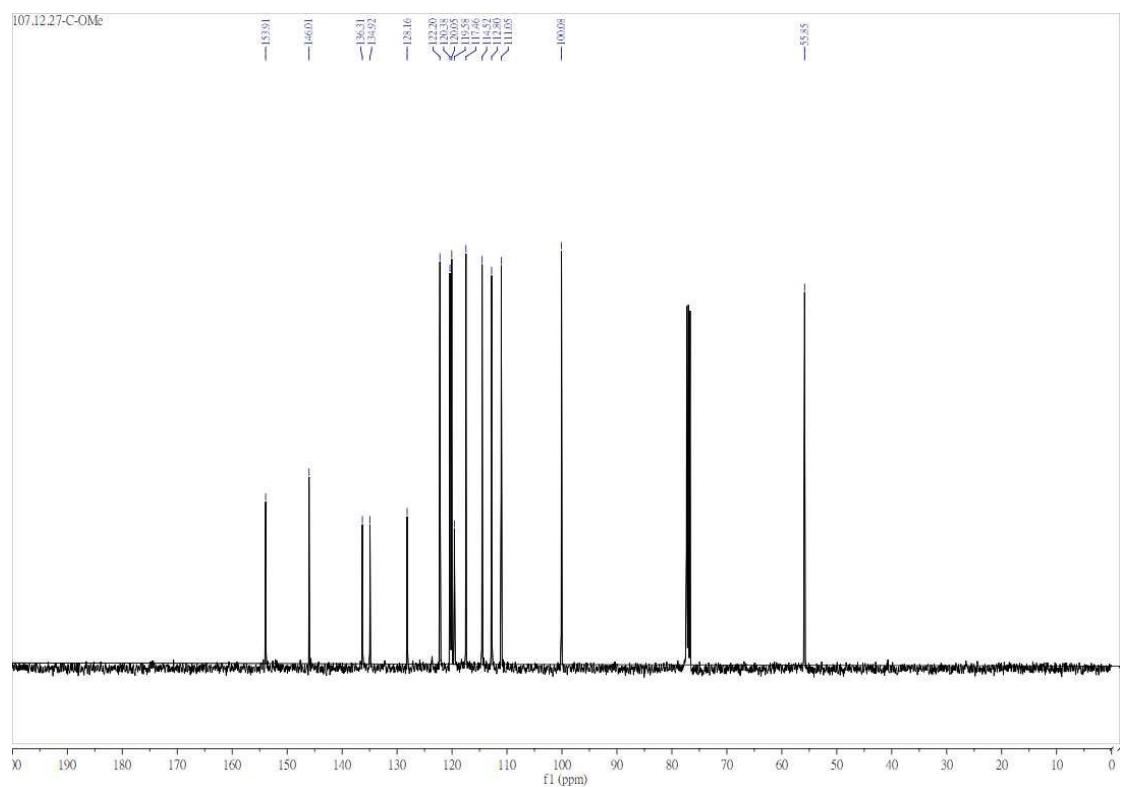

Figure S9.  $^{13}\text{C}$  NMR of  $\text{IndPh}^{\text{OMe}}\text{OH}$  ( $\text{L}^3\text{H}$ )









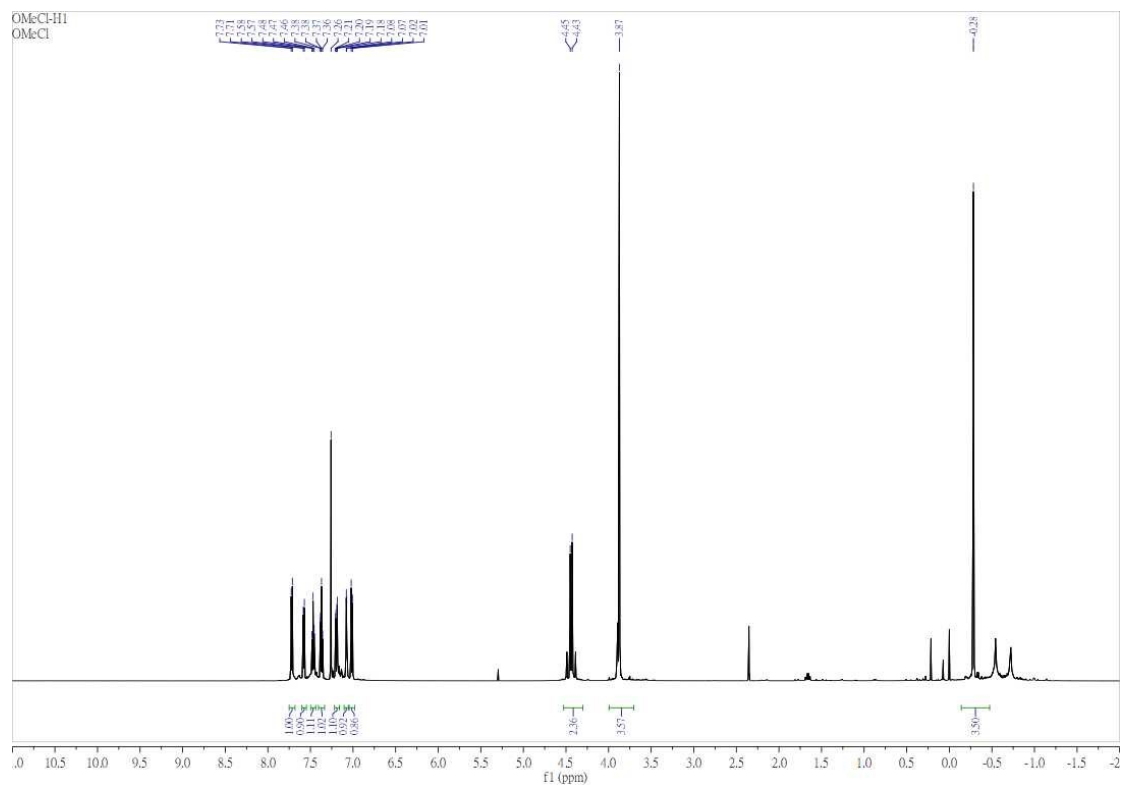

**Figure S16.**  $^1\text{H}$  NMR of  $[\text{IndHPh}^{\text{OMeO}}]\text{Al}(\text{CH}_3)\text{Cl}$  (**3**)

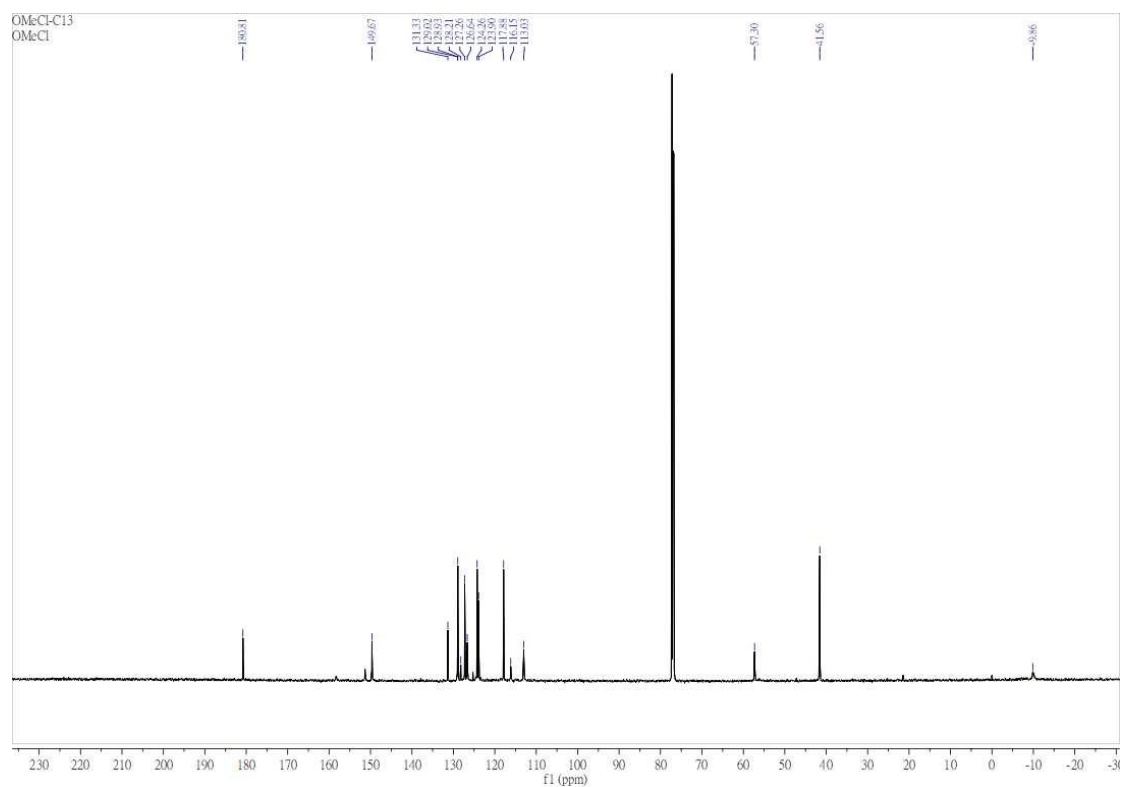

**Figure S17.**  $^{13}\text{C}$  NMR of  $[\text{IndHPh}^{\text{OMeO}}]\text{Al}(\text{CH}_3)\text{Cl}$  (**3**)

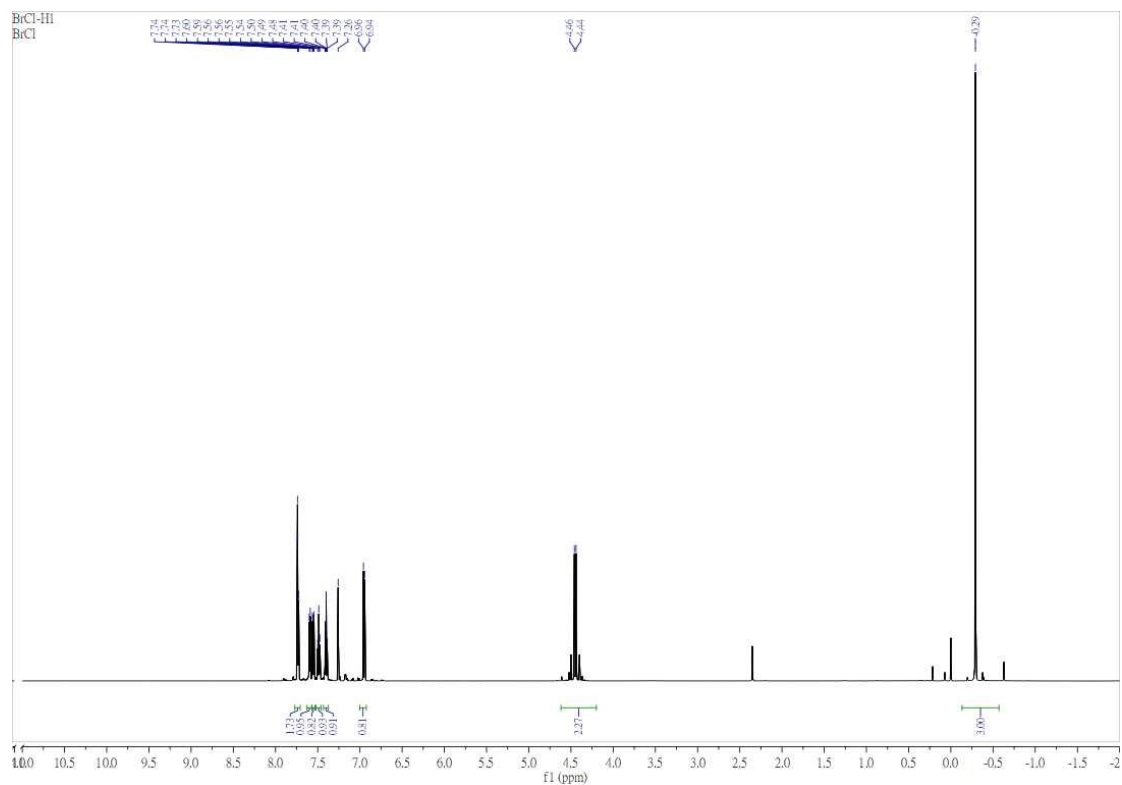

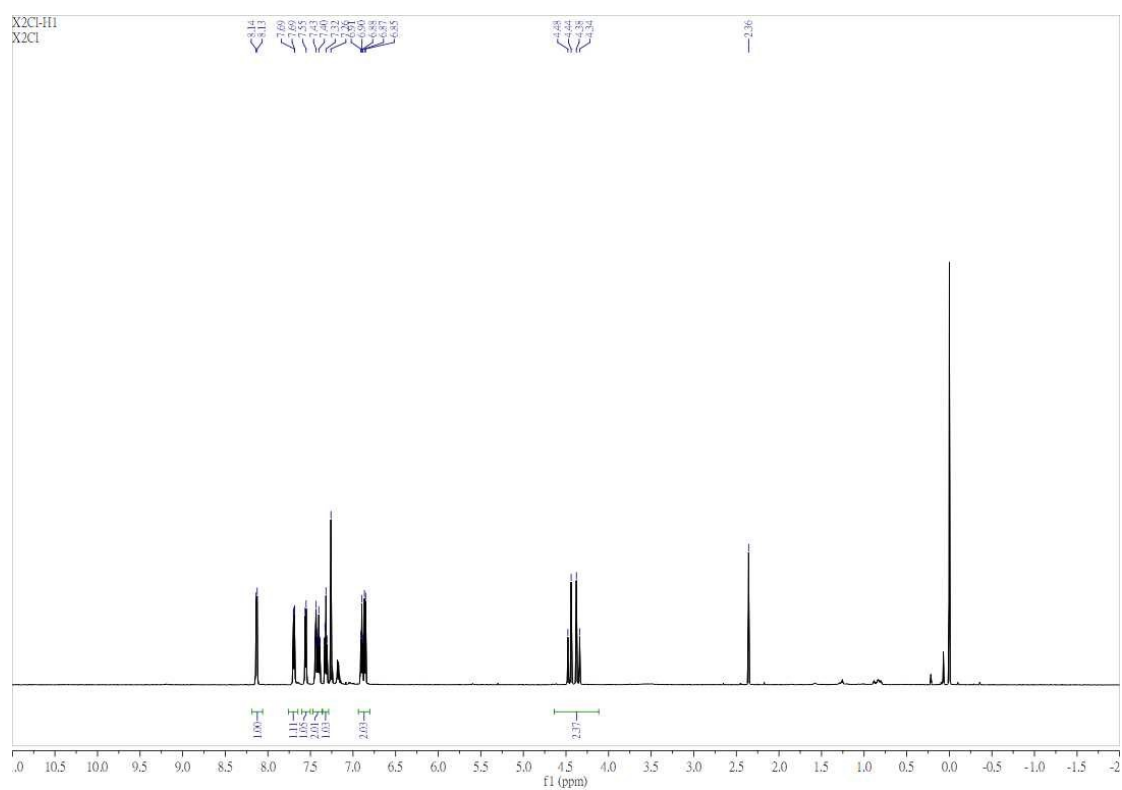

**Figure S20.** <sup>1</sup>H NMR of [IndHPh<sup>H</sup>O]<sub>2</sub>AlCl (5)

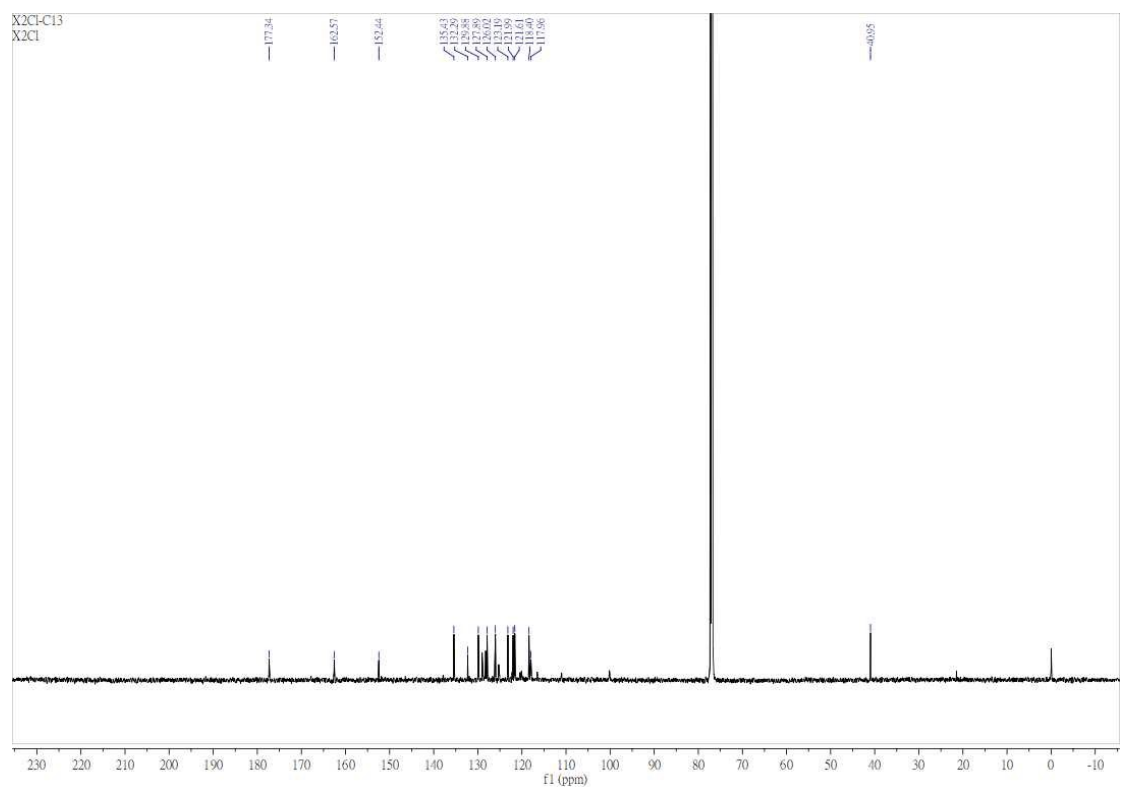

**Figure S21.** <sup>13</sup>C NMR of [IndHPh<sup>H</sup>O]<sub>2</sub>AlCl (5)

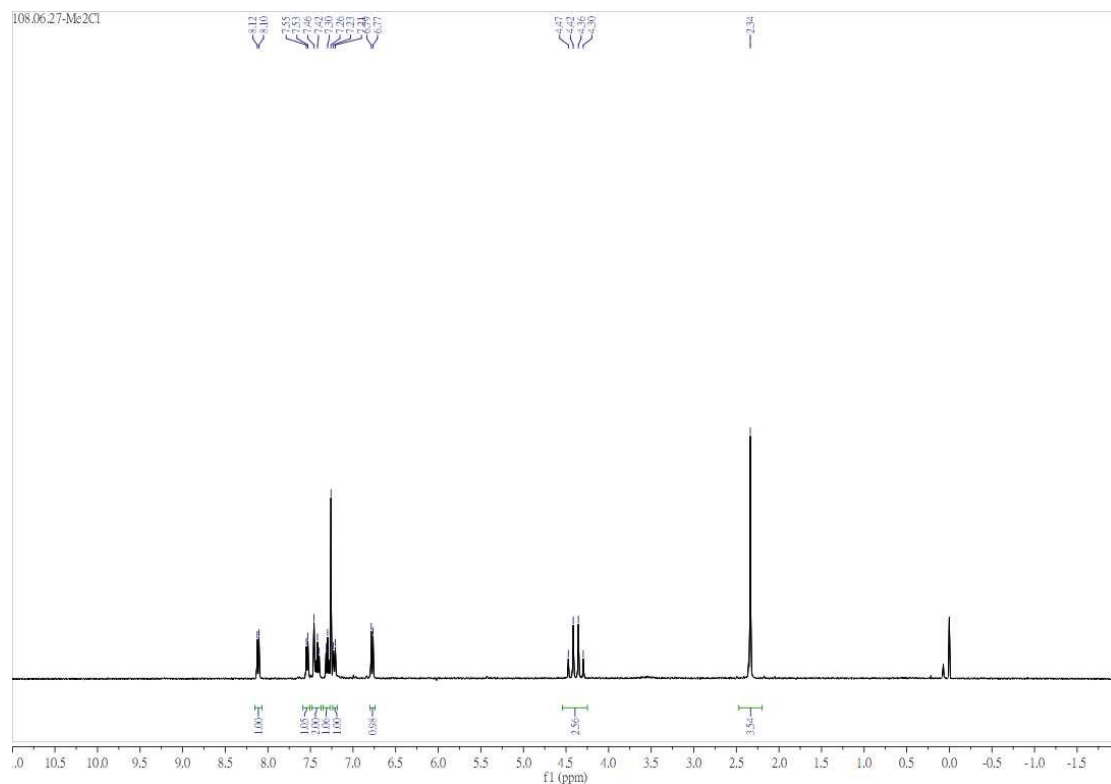

Figure S22. <sup>1</sup>H NMR of [IndHPh<sup>Me</sup>O]<sub>2</sub>AlCl (6)

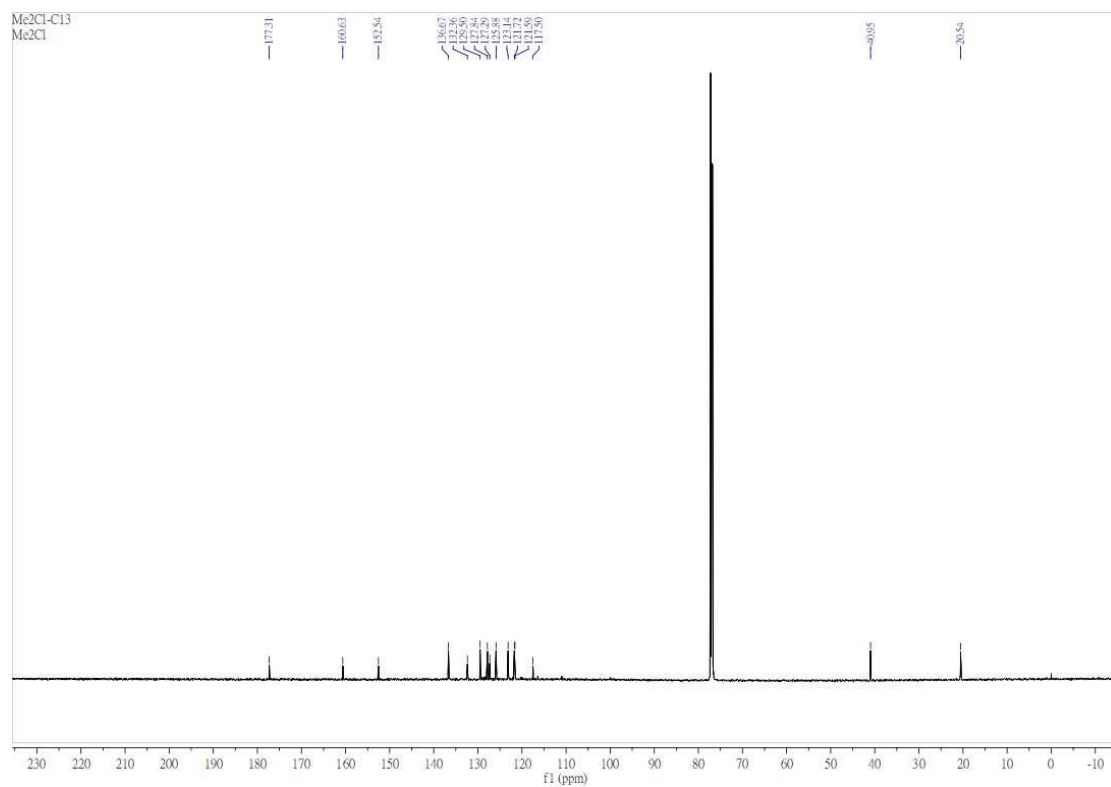

Figure S23. <sup>13</sup>C NMR of [IndHPh<sup>Me</sup>O]<sub>2</sub>AlCl (6)

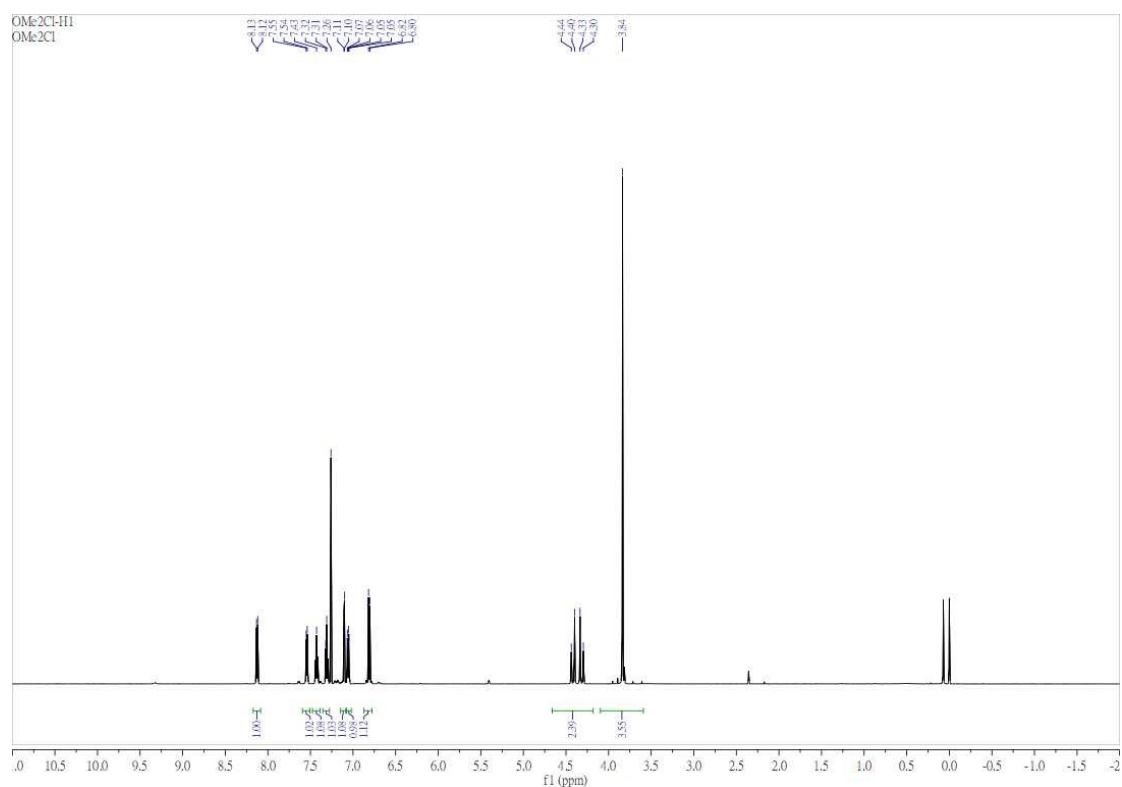

Figure S24.  $^1\text{H}$  NMR of  $[\text{IndHPh}^{\text{OMeO}}]_2\text{AlCl}$  (7)

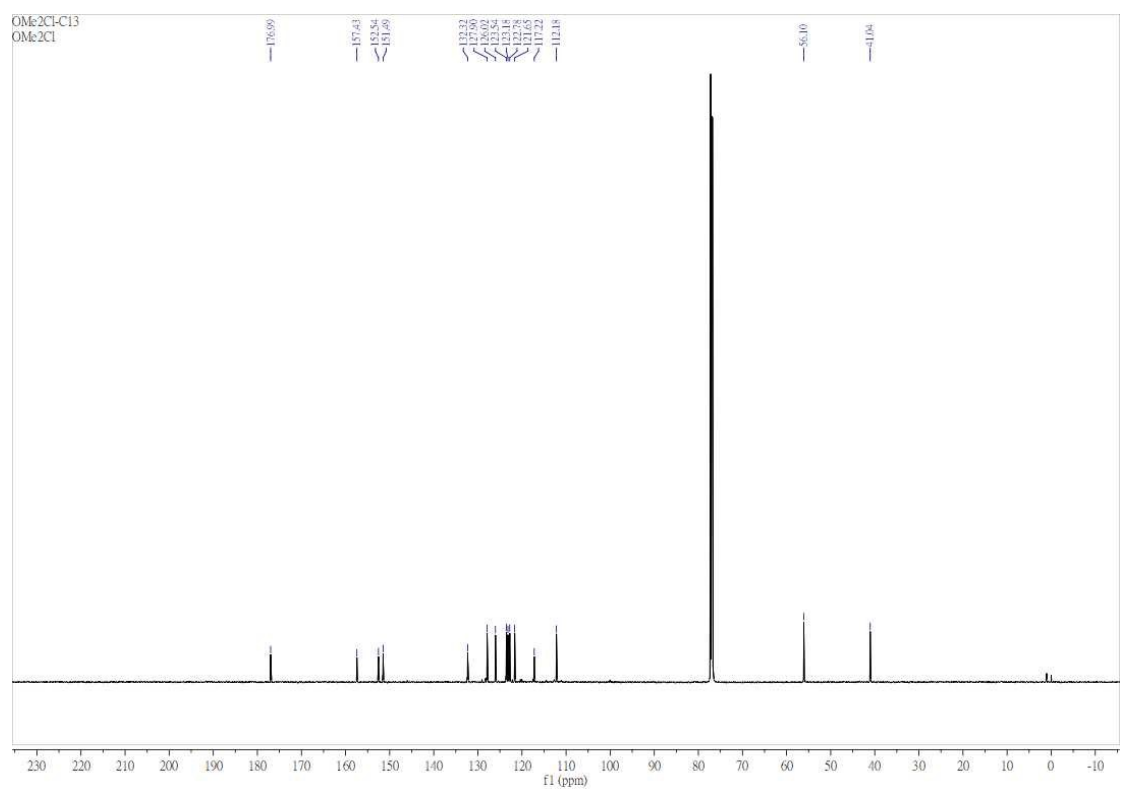

Figure S25.  $^{13}\text{C}$  NMR of  $[\text{IndHPh}^{\text{OMeO}}]_2\text{AlCl}$  (7)
